# Supplementary material for: Smoking and quit attempts during pregnancy and postpartum: a longitudinal UK cohort
Source: PubMed Central journal article supplement (PMC5695489; doi:10.1136/bmjopen-2017-018746), 2017-11-15
Supplement: bmjopen-2017-018746supp002.pdf [file bmjopen-2017-018746supp002.pdf]

**Appendix Table S1** Cross-sectional data: participants' smoking behaviour for returned questionnaires only at each follow up point

| <b>Characteristic</b>                                                                                      | <b>Baseline (Early pregnancy)<br/>N (%)</b> | <b>Late pregnancy<br/>N (%)</b> | <b>Postpartum<br/>N (%)</b> |
|------------------------------------------------------------------------------------------------------------|---------------------------------------------|---------------------------------|-----------------------------|
| <b>Respondents</b> (response rate)                                                                         | 850                                         | 509 (59.9)                      | 476 (56.0)                  |
| <b>Smoking status</b>                                                                                      |                                             |                                 |                             |
| Current smoker                                                                                             | 488 (57.4)                                  | 252 (49.5)                      | 281 (59.0)                  |
| Recent ex-smoker                                                                                           | 362 (42.6)                                  | 257 (50.5)                      | 195 (41.0)                  |
| <b>Current smoking behaviour (all participants)</b>                                                        |                                             |                                 |                             |
| Stopped smoking during 3 months prior to pregnancy                                                         | 61 (7.2)                                    |                                 |                             |
| Stopped smoking after learning of pregnancy/don't smoke at all now                                         | 301 (35.4)                                  | 257 (50.5)                      | 195 (41.0)                  |
| Smoke occasionally, but not every day now pregnant                                                         | 117 (13.8)                                  | 61 (12.0)                       | 84 (17.6)                   |
| Smoke every day, but have cut down since: learning of pregnancy/during pregnancy                           | 304 (35.8)                                  | 144 (28.3)                      | 56 (11.8)                   |
| Smoke every day, about the same as before/during pregnancy                                                 | 64 (7.5)                                    | 42 (8.3)                        | 80 (16.8)                   |
| Smoke every day, tend to smoke more than before/during pregnancy                                           | 3 (0.4)                                     | 4 (0.8)                         | 59 (12.4)                   |
| Missing                                                                                                    | 0                                           | 1 (0.2)                         | 2 (0.4)                     |
| <b>Current smokers only:</b>                                                                               |                                             |                                 |                             |
| <b>Reported quit attempt since learning of pregnancy/previous questionnaire/birth of baby <sup>a</sup></b> |                                             |                                 |                             |
| Yes                                                                                                        | 272 (55.7)                                  | 130 (51.6)                      | 78 (27.8)                   |
| No                                                                                                         | 200 (41.0)                                  | 119 (47.2)                      | 191 (68.0)                  |
| Missing                                                                                                    | 16 (3.3)                                    | 3 (1.2)                         | 12 (4.3)                    |
| <b>If have made a quit attempt, attempt lasted at least 24 hours</b>                                       |                                             |                                 |                             |
| Yes<br>(% of all current smokers)<br>(% of current smokers making a quit attempt)                          | 178<br>(36.5%)<br>(65.4%)                   | 103<br>(40.9%)<br>(79.2%)       | 61<br>(21.7%)<br>(78.2%)    |
| No<br>(% of all current smokers)<br>(% of current smokers making a quit attempt)                           | 90<br>(18.4%)<br>(33.1%)                    | 19<br>(7.5%)<br>(14.6%)         | 6<br>(2.1%)<br>(7.7%)       |
| <b>Number of quit attempts &gt;24 hours, median (IQR)</b>                                                  | 2 (1-3)                                     | 2 (1-5)                         | 2 (1-4)                     |
| <b>Cigarettes per day</b>                                                                                  |                                             |                                 |                             |
| 0-5                                                                                                        | 191 (39.1)                                  | 99 (39.3)                       | 102 (36.3)                  |
| 6-10                                                                                                       | 151 (30.9)                                  | 85 (33.7)                       | 83 (29.5)                   |
| 11-15                                                                                                      | 74 (15.2)                                   | 32 (12.7)                       | 55 (19.6)                   |
| 16-20                                                                                                      | 47 (9.6)                                    | 24 (9.5)                        | 30 (10.7)                   |
| 21-30                                                                                                      | 8 (1.6)                                     | 9 (3.6)                         | 5 (1.8)                     |
| ≥31                                                                                                        | 2 (0.4)                                     | 0 (0)                           | 1 (0.4)                     |
| Missing                                                                                                    | 15 (3.1)                                    | 3 (1.2)                         | 5 (1.8)                     |
| <b>Time to first cigarette</b>                                                                             |                                             |                                 |                             |
| < 5 minutes                                                                                                | 97 (19.9)                                   | 31 (12.3)                       | 28 (10.0)                   |
| 6-30 minutes                                                                                               | 163 (33.4)                                  | 79 (31.3)                       | 83 (29.5)                   |
| 31-60 minutes                                                                                              | 89 (18.2)                                   | 44 (17.5)                       | 50 (17.8)                   |

|                                         |            |            |            |
|-----------------------------------------|------------|------------|------------|
| >60 minutes                             | 117 (24.0) | 91 (36.1)  | 105 (37.4) |
| Missing                                 | 22 (4.5)   | 7 (2.8)    | 15 (5.3)   |
|                                         |            |            |            |
| <b>Heaviness of Smoking Index (HSI)</b> |            |            |            |
| Low dependence (0-2)                    | 310 (63.5) | 178 (70.6) | 189 (67.3) |
| Moderate dependence (3-4)               | 146 (29.9) | 60 (23.8)  | 75 (26.7)  |
| High dependence (5-6)                   | 8 (1.6)    | 6 (2.4)    | 2 (0.7)    |
| Missing                                 | 24 (4.9)   | 8 (3.2)    | 15 (5.3)   |
|                                         |            |            |            |
| <b>Intention to quit smoking</b>        |            |            |            |
| Intending to quit within next 2 weeks   | 138 (28.3) | 51 (20.2)  | 20 (7.1)   |
| Intending to quit within next 30 days   | 59 (12.1)  | 23 (9.1)   | 22 (7.8)   |
| Intending to quit within next 3 months  | 76 (15.6)  | 73 (29.0)  | 100 (35.6) |
| Not seriously intending to quit         | 176 (36.1) | 90 (35.7)  | 123 (43.8) |
| Missing                                 | 39 (8.0)   | 15 (6.0)   | 16 (5.7)   |

<sup>a</sup> Quit attempts: at baseline, since finding out about the pregnancy; at follow-up 1, since completing previous survey; follow-up 2, since birth of baby
